# Supplementary material for: The Roles of Nicotinamide Adenine Dinucleotide Phosphate Reoxidation and Ammonium Assimilation in the Secretion of Amino Acids as Byproducts of Clostridium thermocellum
Source: PubMed Central journal article supplement (PMC9888227; doi:10.1128/aem.01753-22), 2023-01-10
Supplement: aem.01753-22-s0001.pdf [file aem.01753-22-s0001.pdf]

## SUPPLEMENTAL TABLES

**TABLE S1.** Molecular weight and elemental composition of a general protein in the *C. thermocellum* ATCC 27405 genome by counting the occurrences of each amino acid in all open-reading frames and correcting for polymerization (loss of H<sub>2</sub>O).

| Amino acid                    | Molecular formula <sup>a</sup>                                            | M <sub>W,amino acid</sub> (g/mol) | M <sub>W,amino acid</sub> corrected for polymerization (g/mol) | Count (all ORFs) | % Prevalance (mol <sub>aa</sub> /mol <sub>prot</sub> ) | M <sub>W,protein</sub> (g <sub>aa</sub> /mol <sub>prot</sub> ) | Element in protein (mol/mol <sub>prot</sub> ) |             |             |             |             |
|-------------------------------|---------------------------------------------------------------------------|-----------------------------------|----------------------------------------------------------------|------------------|--------------------------------------------------------|----------------------------------------------------------------|-----------------------------------------------|-------------|-------------|-------------|-------------|
|                               |                                                                           |                                   |                                                                |                  |                                                        |                                                                | C                                             | H           | N           | O           | S           |
| Alanine                       | C <sub>3</sub> H <sub>7</sub> NO <sub>2</sub>                             | 89.1                              | 71.1                                                           | 68886            | 6.38                                                   | 4.53                                                           | 0.19                                          | 0.45        | 0.06        | 0.13        | 0.00        |
| Arginine                      | C <sub>6</sub> H <sub>15</sub> N <sub>4</sub> O <sub>2</sub> <sup>+</sup> | 175.2                             | 157.2                                                          | 47155            | 4.37                                                   | 6.87                                                           | 0.26                                          | 0.66        | 0.17        | 0.09        | 0.00        |
| Asparagine                    | C <sub>4</sub> H <sub>8</sub> N <sub>2</sub> O <sub>3</sub>               | 132.1                             | 114.1                                                          | 58251            | 5.39                                                   | 6.16                                                           | 0.22                                          | 0.43        | 0.11        | 0.16        | 0.00        |
| Aspartate                     | C <sub>4</sub> H <sub>6</sub> NO <sub>4</sub> <sup>-</sup>                | 132.1                             | 114.1                                                          | 61489            | 5.69                                                   | 6.50                                                           | 0.23                                          | 0.34        | 0.06        | 0.23        | 0.00        |
| Cysteine                      | C <sub>3</sub> H <sub>7</sub> NO <sub>2</sub> S                           | 121.2                             | 103.1                                                          | 12654            | 1.17                                                   | 1.21                                                           | 0.04                                          | 0.08        | 0.01        | 0.02        | 0.01        |
| Glutamate                     | C <sub>5</sub> H <sub>8</sub> NO <sub>4</sub> <sup>-</sup>                | 146.1                             | 128.1                                                          | 82288            | 7.62                                                   | 9.76                                                           | 0.38                                          | 0.61        | 0.08        | 0.30        | 0.00        |
| Glutamine                     | C <sub>5</sub> H <sub>10</sub> N <sub>2</sub> O <sub>3</sub>              | 146.2                             | 128.1                                                          | 27732            | 2.57                                                   | 3.29                                                           | 0.13                                          | 0.26        | 0.05        | 0.08        | 0.00        |
| Glycine                       | C <sub>2</sub> H <sub>5</sub> NO <sub>2</sub>                             | 75.1                              | 57.1                                                           | 72154            | 6.68                                                   | 3.81                                                           | 0.13                                          | 0.33        | 0.07        | 0.13        | 0.00        |
| Histidine                     | C <sub>6</sub> H <sub>9</sub> N <sub>3</sub> O <sub>2</sub>               | 155.2                             | 137.1                                                          | 15430            | 1.43                                                   | 1.96                                                           | 0.09                                          | 0.13        | 0.04        | 0.03        | 0.00        |
| Isoleucine                    | C <sub>6</sub> H <sub>13</sub> NO <sub>2</sub>                            | 131.2                             | 113.2                                                          | 91626            | 8.49                                                   | 9.60                                                           | 0.51                                          | 1.10        | 0.08        | 0.17        | 0.00        |
| Leucine                       | C <sub>6</sub> H <sub>13</sub> NO <sub>2</sub>                            | 131.2                             | 113.2                                                          | 93461            | 8.66                                                   | 9.79                                                           | 0.52                                          | 1.13        | 0.09        | 0.17        | 0.00        |
| Lysine                        | C <sub>6</sub> H <sub>15</sub> N <sub>2</sub> O <sub>2</sub> <sup>+</sup> | 147.2                             | 129.2                                                          | 87426            | 8.10                                                   | 10.46                                                          | 0.49                                          | 1.21        | 0.16        | 0.16        | 0.00        |
| Methionine                    | C <sub>5</sub> H <sub>11</sub> NO <sub>2</sub> S                          | 149.2                             | 131.2                                                          | 27111            | 2.51                                                   | 3.29                                                           | 0.13                                          | 0.28        | 0.03        | 0.05        | 0.03        |
| Phenylalanine                 | C <sub>9</sub> H <sub>11</sub> NO <sub>2</sub>                            | 165.2                             | 147.2                                                          | 45765            | 4.24                                                   | 6.24                                                           | 0.38                                          | 0.47        | 0.04        | 0.08        | 0.00        |
| Proline                       | C <sub>5</sub> H <sub>9</sub> NO <sub>2</sub>                             | 115.1                             | 97.1                                                           | 36619            | 3.39                                                   | 3.29                                                           | 0.17                                          | 0.31        | 0.03        | 0.07        | 0.00        |
| Serine                        | C <sub>3</sub> H <sub>7</sub> NO <sub>3</sub>                             | 105.1                             | 87.1                                                           | 65270            | 6.04                                                   | 5.26                                                           | 0.18                                          | 0.42        | 0.06        | 0.18        | 0.00        |
| Threonine                     | C <sub>4</sub> H <sub>9</sub> NO <sub>3</sub>                             | 119.1                             | 101.1                                                          | 54463            | 5.04                                                   | 5.10                                                           | 0.20                                          | 0.45        | 0.05        | 0.15        | 0.00        |
| Tryptophan                    | C <sub>11</sub> H <sub>12</sub> N <sub>2</sub> O <sub>2</sub>             | 204.2                             | 186.2                                                          | 9570             | 0.89                                                   | 1.65                                                           | 0.10                                          | 0.11        | 0.02        | 0.02        | 0.00        |
| Tyrosine                      | C <sub>9</sub> H <sub>11</sub> NO <sub>3</sub>                            | 181.2                             | 163.2                                                          | 45643            | 4.23                                                   | 6.90                                                           | 0.38                                          | 0.46        | 0.04        | 0.13        | 0.00        |
| Valine                        | C <sub>5</sub> H <sub>11</sub> NO <sub>2</sub>                            | 117.1                             | 99.1                                                           | 76806            | 7.11                                                   | 7.05                                                           | 0.36                                          | 0.78        | 0.07        | 0.14        | 0.00        |
| Total                         |                                                                           | -                                 | -                                                              | 1079799          | 100                                                    | <b>112.73</b>                                                  | 5.07                                          | 10.01       | 1.33        | 2.50        | 0.04        |
| Corrected for polymerization: |                                                                           |                                   |                                                                |                  |                                                        |                                                                | <b>5.07</b>                                   | <b>8.01</b> | <b>1.33</b> | <b>1.50</b> | <b>0.04</b> |

<sup>a</sup> Based on a pH of 7.0.

**TABLE S2.** Amino acid yields (mmol mol<sub>cellulose</sub><sup>-1</sup>) in chemostats with either cellobiose or ammonium as the sole limiting nutrient at a dilution rate of 0.10 h<sup>-1</sup>.<sup>a</sup>

|                              | Cellobiose-limitation    |                                                       |                          |                           |                           | Ammonium-limitation      |                                                       |                          |                           |                           |
|------------------------------|--------------------------|-------------------------------------------------------|--------------------------|---------------------------|---------------------------|--------------------------|-------------------------------------------------------|--------------------------|---------------------------|---------------------------|
|                              | Reference strain (LL345) | AVM064 ( $\Delta ppdk$ $\Delta malE::P_{eno^-} pyk$ ) | AVM003 ( $\Delta ppdk$ ) | LL1084 ( $\Delta nfnAB$ ) | AG1715 ( $\Delta gogat$ ) | Reference strain (LL345) | AVM064 ( $\Delta ppdk$ $\Delta malE::P_{eno^-} pyk$ ) | AVM003 ( $\Delta ppdk$ ) | LL1084 ( $\Delta nfnAB$ ) | AG1715 ( $\Delta gogat$ ) |
| <b>Alanine</b>               | 6.5 ± 0.2                | 6.7 ± 0.4                                             | 6.7 ± 0.5                | 6.8 ± 0.2                 | 5.6 ± 0.1                 | 9.5 ± 0.1                | 6.1 ± 0.4                                             | 9.0 ± 0.4                | 8.0 ± 0.4                 | 5.3 ± 0.4                 |
| <b>Asparagine</b>            | <0.5                     | <0.5                                                  | <0.5                     | <0.5                      | <0.5                      | <0.5                     | <0.5                                                  | <0.5                     | <0.5                      | <0.5                      |
| <b>Aspartate</b>             | <0.5                     | 2.2 ± 0.3                                             | 1.0 ± 0.1                | 0.9 ± 0.5                 | 1.1 ± 0.7                 | <0.5                     | 0.8 ± 0.2                                             | <0.5                     | 0.7 ± 0.1                 | <0.5                      |
| <b>Glycine</b>               | 2.0 ± 0.2                | 2.4 ± 0.2                                             | 2.2 ± 0.2                | 1.9 ± 0.0                 | 1.5 ± 0.2                 | 2.2 ± 0.1                | 1.6 ± 0.2                                             | 1.9 ± 0.2                | 2.0 ± 0.2                 | <0.5                      |
| <b>Glutamate</b>             | 2.8 ± 0.1                | 2.7 ± 0.4                                             | 2.2 ± 0.1                | 3.1 ± 0.2                 | 2.8 ± 0.2                 | 5.8 ± 0.1                | 4.2 ± 0.2                                             | 4.9 ± 0.2                | 8.3 ± 0.4                 | 5.5 ± 0.5                 |
| <b>Glutamine<sup>b</sup></b> | <0.7 ± 0.0               | <2.0 ± 0.4                                            | <2.1 ± 0.7               | <1.7 ± 0.2                | <0.6 ± 0.1                | <0.5                     | <2.1 ± 0.2                                            | <2.8 ± 0.3               | <1.0 ± 0.1                | <0.5                      |
| <b>Histidine</b>             | <0.5                     | <0.5                                                  | <0.5                     | <0.5                      | <0.5                      | <0.5                     | <0.5                                                  | <0.5                     | <0.5                      | <0.5                      |
| <b>Isoleucine</b>            | 1.3 ± 0.0                | 0.7 ± 0.0                                             | 1.5 ± 0.1                | 1.6 ± 0.2                 | 1.1 ± 0.0                 | 10.0 ± 0.2               | 3.7 ± 0.4                                             | 11.2 ± 2.4               | 9.1 ± 0.8                 | 2.5 ± 0.8                 |
| <b>Leucine</b>               | 0.8 ± 0.0                | 1.4 ± 0.1                                             | <0.5                     | 0.7 ± 0.6                 | 0.8 ± 0.0                 | 2.5 ± 0.1                | 2.3 ± 0.2                                             | 2.9 ± 0.1                | 2.8 ± 0.1                 | 1.1 ± 0.2                 |
| <b>Methionine</b>            | <0.5                     | <0.5                                                  | <0.5                     | <0.5                      | <0.5                      | 6.3 ± 0.5                | <0.5                                                  | <0.5                     | 0.9 ± 0.3                 | <0.5                      |
| <b>Phenylalanine</b>         | 1.1 ± 0.1                | 4.2 ± 0.6                                             | 1.2 ± 0.3                | 0.9 ± 0.2                 | 0.9 ± 0.1                 | 4.2 ± 0.1                | 4.4 ± 1.3                                             | 4.2 ± 0.5                | 5.8 ± 0.2                 | 4.7 ± 1.0                 |
| <b>Serine</b>                | 2.6 ± 0.2                | 2.1 ± 0.1                                             | 2.3 ± 0.0                | 2.5 ± 0.1                 | 2.0 ± 0.1                 | 1.9 ± 0.2                | 1.4 ± 0.1                                             | 2.0 ± 0.1                | 2.0 ± 0.2                 | 1.2 ± 0.5                 |
| <b>Threonine</b>             | 3.4 ± 0.3                | 3.8 ± 0.4                                             | 3.5 ± 0.4                | 3.6 ± 0.2                 | 2.9 ± 0.3                 | 3.6 ± 0.1                | 3.6 ± 0.4                                             | 3.0 ± 0.4                | 5.2 ± 0.5                 | <0.5                      |
| <b>Tryptophan</b>            | <0.5                     | <0.5                                                  | <0.5                     | <0.5                      | <0.5                      | <0.5                     | <0.5                                                  | <0.5                     | <0.5                      | <0.5                      |
| <b>Tyrosine</b>              | 0.9 ± 0.0                | 0.8 ± 0.1                                             | <0.5                     | <0.5                      | <0.5                      | 1.9 ± 0.1                | 1.1 ± 0.1                                             | 1.4 ± 0.1                | 4.0 ± 1.0                 | <0.5                      |
| <b>Valine</b>                | 3.3 ± 0.1                | 1.3 ± 0.1                                             | 5.1 ± 0.3                | 5.8 ± 0.3                 | 2.3 ± 0.1                 | 67.3 ± 1.7               | 12.6 ± 2.8                                            | 62.3 ± 23.1              | 65.3 ± 8.3                | 16.0 ± 9.4                |

<sup>a</sup> Data are shown as average ± standard deviation for three biological replicates

<sup>b</sup> Estimated upper limit (see Materials and Methods)

**TABLE S3.** Carbon recovery on consumed cellobiose in chemostats limited on either cellobiose or ammonium at a dilution rate of 0.10 h<sup>-1</sup>.<sup>a</sup>

| % (Cmol/Cmol)                         | Cellobiose-limitation    |                                                         |                          |                           |                           | Ammonium-limitation      |                                                         |                          |                           |                           |
|---------------------------------------|--------------------------|---------------------------------------------------------|--------------------------|---------------------------|---------------------------|--------------------------|---------------------------------------------------------|--------------------------|---------------------------|---------------------------|
|                                       | Reference strain (LL345) | AVM064 ( $\Delta ppdk$ $\Delta malE::P_{eno^-}$ $pyk$ ) | AVM003 ( $\Delta ppdk$ ) | LL1084 ( $\Delta nfnAB$ ) | AG1715 ( $\Delta gogat$ ) | Reference strain (LL345) | AVM064 ( $\Delta ppdk$ $\Delta malE::P_{eno^-}$ $pyk$ ) | AVM003 ( $\Delta ppdk$ ) | LL1084 ( $\Delta nfnAB$ ) | AG1715 ( $\Delta gogat$ ) |
| <b>Biomass<sup>b</sup></b>            | 15.49 ± 0.27             | 14.34 ± 0.61                                            | 16.79 ± 0.76             | 15.07 ± 0.04              | 15.79 ± 0.20              | 13.48 ± 0.12             | 13.21 ± 0.51                                            | 14.60 ± 0.64             | 13.49 ± 0.62              | 16.03 ± 0.57              |
| <b>Glucose</b>                        | 0.16 ± 0.02              | 0.06 ± 0.02                                             | 0.07 ± 0.03              | 0.03 ± 0.00               | 0.08 ± 0.03               | 0.59 ± 0.07              | 1.02 ± 0.18                                             | 1.56 ± 0.20              | 1.39 ± 0.12               | 1.55 ± 0.38               |
| <b>Ethanol</b>                        | 16.16 ± 0.97             | 25.78 ± 0.17                                            | 16.00 ± 0.55             | 16.04 ± 0.27              | 13.99 ± 1.10              | 17.76 ± 0.46             | 25.86 ± 0.89                                            | 14.06 ± 0.82             | 16.73 ± 0.42              | 12.91 ± 0.56              |
| <b>Acetate</b>                        | 23.04 ± 0.22             | 10.81 ± 0.30                                            | 24.29 ± 0.72             | 23.01 ± 0.31              | 23.00 ± 0.25              | 15.60 ± 0.10             | 10.09 ± 0.17                                            | 19.57 ± 2.00             | 16.85 ± 0.22              | 14.00 ± 1.13              |
| <b>Formate</b>                        | 0.96 ± 0.31              | 1.87 ± 0.16                                             | 0.81 ± 0.10              | 2.56 ± 0.06               | 0.62 ± 0.06               | 1.23 ± 0.09              | 2.64 ± 0.27                                             | 1.52 ± 0.43              | 1.04 ± 0.23               | 2.48 ± 1.02               |
| <b>Lactate</b>                        | 0.35 ± 0.03              | 0.51 ± 0.07                                             | 0.43 ± 0.05              | 0.30 ± 0.05               | 0.40 ± 0.05               | 1.68 ± 0.14              | 1.02 ± 0.41                                             | 1.53 ± 0.51              | 1.41 ± 0.10               | 0.92 ± 0.45               |
| <b>Pyruvate</b>                       | 0.09 ± 0.01              | 0.06 ± 0.02                                             | 0.33 ± 0.21              | 0.21 ± 0.04               | 0.27 ± 0.02               | 2.25 ± 0.12              | 0.28 ± 0.05                                             | 0.57 ± 0.11              | 0.77 ± 0.10               | 0.58 ± 0.29               |
| <b>Malate</b>                         | 0.16 ± 0.16              | 3.64 ± 0.62                                             | <0.01                    | <0.01                     | <0.01                     | <0.01                    | 1.13 ± 0.11                                             | <0.01                    | 0.07 ± 0.04               | <0.01                     |
| <b>CO<sub>2</sub><sup>c</sup></b>     | 19.83 ± 0.16             | 16.68 ± 0.36                                            | 20.66 ± 0.48             | 18.19 ± 0.26              | 19.11 ± 0.42              | 17.26 ± 0.23             | 16.29 ± 0.07                                            | 17.18 ± 0.69             | 17.55 ± 0.18              | 12.36 ± 0.97              |
| <b>H<sub>2</sub></b>                  | 0                        | 0                                                       | 0                        | 0                         | 0                         | 0                        | 0                                                       | 0                        | 0                         | 0                         |
| <b>Ex. protein<sup>d</sup></b>        | 3.94 ± 0.11              | 2.36 ± 0.18                                             | 3.19 ± 0.18              | 4.08 ± 0.14               | 3.40 ± 0.08               | 2.00 ± 0.08              | 1.50 ± 0.16                                             | 2.29 ± 0.14              | 1.87 ± 0.06               | 1.86 ± 0.25               |
| <b>Alanine</b>                        | 0.16 ± 0.01              | 0.17 ± 0.01                                             | 0.17 ± 0.01              | 0.17 ± 0.01               | 0.14 ± 0.00               | 0.24 ± 0.00              | 0.15 ± 0.01                                             | 0.22 ± 0.01              | 0.20 ± 0.01               | 0.13 ± 0.01               |
| <b>Asparagine</b>                     | <0.01                    | <0.01                                                   | <0.01                    | <0.01                     | <0.01                     | <0.01                    | <0.01                                                   | <0.01                    | <0.01                     | <0.01                     |
| <b>Aspartate</b>                      | 0.01 ± 0.02              | 0.07 ± 0.01                                             | 0.03 ± 0.00              | 0.03 ± 0.02               | 0.04 ± 0.02               | 0.01 ± 0.00              | 0.03 ± 0.01                                             | <0.01                    | 0.02 ± 0.00               | <0.01                     |
| <b>Glycine</b>                        | 0.04 ± 0.01              | 0.04 ± 0.00                                             | 0.04 ± 0.00              | 0.03 ± 0.00               | 0.03 ± 0.00               | 0.04 ± 0.00              | 0.03 ± 0.00                                             | 0.03 ± 0.00              | 0.03 ± 0.00               | <0.01                     |
| <b>Glutamate</b>                      | 0.12 ± 0.01              | 0.11 ± 0.02                                             | 0.09 ± 0.01              | 0.13 ± 0.01               | 0.12 ± 0.01               | 0.24 ± 0.01              | 0.17 ± 0.01                                             | 0.20 ± 0.01              | 0.35 ± 0.01               | 0.23 ± 0.02               |
| <b>Glutamine/arginine<sup>e</sup></b> | 0.03 ± 0.00              | 0.08 ± 0.02                                             | 0.09 ± 0.03              | 0.07 ± 0.01               | 0.02 ± 0.00               | 0.02 ± 0.01              | 0.09 ± 0.01                                             | 0.12 ± 0.01              | 0.04 ± 0.00               | 0.02 ± 0.00               |
| <b>Histidine</b>                      | <0.01                    | <0.01                                                   | <0.01                    | <0.01                     | <0.01                     | <0.01                    | <0.01                                                   | 0.02 ± 0.00              | <0.01                     | <0.01                     |
| <b>Isoleucine</b>                     | 0.06 ± 0.00              | 0.03 ± 0.00                                             | 0.07 ± 0.00              | 0.08 ± 0.01               | 0.05 ± 0.00               | 0.50 ± 0.01              | 0.18 ± 0.02                                             | 0.56 ± 0.12              | 0.45 ± 0.04               | 0.12 ± 0.04               |
| <b>Leucine</b>                        | 0.04 ± 0.00              | 0.07 ± 0.01                                             | <0.01                    | 0.03 ± 0.03               | 0.04 ± 0.00               | 0.13 ± 0.01              | 0.11 ± 0.01                                             | 0.15 ± 0.00              | 0.14 ± 0.01               | 0.06 ± 0.01               |
| <b>Methionine</b>                     | <0.01                    | <0.01                                                   | <0.01                    | <0.01                     | <0.01                     | 0.26 ± 0.02              | <0.01                                                   | 0.02 ± 0.02              | 0.04 ± 0.01               | <0.01                     |
| <b>Phenylalanine</b>                  | 0.08 ± 0.01              | 0.31 ± 0.04                                             | 0.09 ± 0.02              | 0.07 ± 0.01               | 0.07 ± 0.00               | 0.31 ± 0.01              | 0.33 ± 0.10                                             | 0.31 ± 0.04              | 0.43 ± 0.02               | 0.35 ± 0.08               |
| <b>Serine</b>                         | 0.06 ± 0.01              | 0.05 ± 0.00                                             | 0.06 ± 0.00              | 0.06 ± 0.00               | 0.05 ± 0.00               | 0.05 ± 0.01              | 0.03 ± 0.00                                             | 0.05 ± 0.00              | 0.05 ± 0.00               | 0.03 ± 0.01               |
| <b>Threonine</b>                      | 0.11 ± 0.01              | 0.13 ± 0.01                                             | 0.12 ± 0.01              | 0.12 ± 0.01               | 0.10 ± 0.01               | 0.12 ± 0.00              | 0.12 ± 0.01                                             | 0.10 ± 0.01              | 0.17 ± 0.02               | 0.02 ± 0.01               |
| <b>Tryptophan</b>                     | <0.01                    | 0.03 ± 0.00                                             | <0.01                    | <0.01                     | <0.01                     | <0.01                    | <0.01                                                   | <0.01                    | <0.01                     | <0.01                     |
| <b>Tyrosine</b>                       | 0.07 ± 0.00              | 0.06 ± 0.01                                             | 0.04 ± 0.00              | <0.01                     | <0.01                     | 0.14 ± 0.01              | 0.08 ± 0.01                                             | 0.10 ± 0.01              | 0.30 ± 0.08               | <0.01                     |
| <b>Valine</b>                         | 0.14 ± 0.01              | 0.05 ± 0.00                                             | 0.21 ± 0.01              | 0.24 ± 0.01               | 0.09 ± 0.00               | 2.80 ± 0.07              | 0.53 ± 0.12                                             | 2.59 ± 0.96              | 2.72 ± 0.35               | 0.67 ± 0.39               |
| <b>Sum of all products</b>            | <b>81 ± 1</b>            | <b>77 ± 0</b>                                           | <b>84 ± 2</b>            | <b>81 ± 1</b>             | <b>77 ± 1</b>             | <b>77 ± 1</b>            | <b>75 ± 1</b>                                           | <b>77 ± 3</b>            | <b>76 ± 1</b>             | <b>64 ± 1</b>             |
| <b>Sum of amino acids</b>             | <b>0.93 ± 0.05</b>       | <b>1.22 ± 0.05</b>                                      | <b>1.01 ± 0.07</b>       | <b>1.04 ± 0.06</b>        | <b>0.75 ± 0.04</b>        | <b>4.86 ± 0.07</b>       | <b>1.88 ± 0.29</b>                                      | <b>4.49 ± 1.11</b>       | <b>4.96 ± 0.34</b>        | <b>1.64 ± 0.42</b>        |

<sup>a</sup> Data are shown as average ± standard deviation for three biological replicates.<sup>b</sup> Based on a molecular weight of 24.66 g mol<sup>-1</sup> for the biomass composition CH<sub>1.71</sub>O<sub>0.43</sub>N<sub>0.20</sub>S<sub>0.01</sub> with 4.32 % ash content (60).<sup>c</sup> Calculated from fermentation product yields and biomass yield (see Materials and Methods).<sup>d</sup> Based on a molecular weight of a general protein (see Supplemental Table S2 and Materials and Methods).<sup>e</sup> Estimated lower value based on 4 carbons per mole.

**TABLE S4.** Degree-of-reduction recovery on consumed cellobiose in chemostats limited on either cellobiose or ammonium at 0.10 h<sup>-1</sup>.<sup>a,b</sup>

| % (DR/DR)                       | Cellobiose-limitation    |                                                    |                         |                          |                          | Ammonium-limitation      |                                                    |                         |                          |                          |
|---------------------------------|--------------------------|----------------------------------------------------|-------------------------|--------------------------|--------------------------|--------------------------|----------------------------------------------------|-------------------------|--------------------------|--------------------------|
|                                 | Reference strain (LL345) | AVM064 ( <i>Δppdk ΔmalE::P<sub>eno</sub>-pyk</i> ) | AVM003 ( <i>Δppdk</i> ) | LL1084 ( <i>ΔnfnAB</i> ) | AG1715 ( <i>Δgogat</i> ) | Reference strain (LL345) | AVM064 ( <i>Δppdk ΔmalE::P<sub>eno</sub>-pyk</i> ) | AVM003 ( <i>Δppdk</i> ) | LL1084 ( <i>ΔnfnAB</i> ) | AG1715 ( <i>Δgogat</i> ) |
| Biomass <sup>c</sup>            | 16.64 ± 0.29             | 15.42 ± 0.66                                       | 18.05 ± 0.81            | 16.20 ± 0.05             | 16.97 ± 0.22             | 14.49 ± 0.13             | 14.20 ± 0.55                                       | 15.69 ± 0.69            | 14.51 ± 0.67             | 17.23 ± 0.61             |
| Glucose                         | 0.16 ± 0.02              | 0.06 ± 0.02                                        | 0.07 ± 0.03             | 0.03 ± 0.00              | 0.08 ± 0.03              | 0.59 ± 0.07              | 1.02 ± 0.18                                        | 1.56 ± 0.20             | 1.39 ± 0.12              | 1.55 ± 0.38              |
| Ethanol                         | 24.24 ± 1.45             | 38.68 ± 0.25                                       | 24.00 ± 0.82            | 24.05 ± 0.40             | 20.98 ± 1.65             | 26.64 ± 0.70             | 38.79 ± 1.34                                       | 21.08 ± 1.22            | 25.09 ± 0.62             | 19.37 ± 0.84             |
| Acetate                         | 23.04 ± 0.22             | 10.81 ± 0.30                                       | 24.29 ± 0.72            | 23.01 ± 0.31             | 23.00 ± 0.25             | 15.60 ± 0.10             | 10.09 ± 0.17                                       | 19.57 ± 2.00            | 16.85 ± 0.22             | 14.00 ± 1.13             |
| Formate                         | 0.48 ± 0.16              | 0.94 ± 0.08                                        | 0.41 ± 0.05             | 1.28 ± 0.03              | 0.31 ± 0.03              | 0.62 ± 0.05              | 1.32 ± 0.13                                        | 0.76 ± 0.21             | 0.52 ± 0.11              | 1.24 ± 0.51              |
| Lactate                         | 0.35 ± 0.03              | 0.51 ± 0.07                                        | 0.43 ± 0.05             | 0.30 ± 0.05              | 0.40 ± 0.05              | 1.68 ± 0.14              | 1.02 ± 0.41                                        | 1.53 ± 0.51             | 1.41 ± 0.10              | 0.92 ± 0.45              |
| Pyruvate                        | 0.07 ± 0.01              | 0.05 ± 0.02                                        | 0.28 ± 0.17             | 0.18 ± 0.04              | 0.22 ± 0.01              | 1.88 ± 0.10              | 0.24 ± 0.04                                        | 0.47 ± 0.09             | 0.64 ± 0.09              | 0.48 ± 0.24              |
| Malate                          | 0.12 ± 0.12              | 2.73 ± 0.47                                        | <0.01                   | <0.01                    | <0.01                    | <0.01                    | 0.85 ± 0.08                                        | <0.01                   | 0.05 ± 0.03              | <0.01                    |
| CO <sub>2</sub> <sup>d</sup>    | 0                        | 0                                                  | 0                       | 0                        | 0                        | 0                        | 0                                                  | 0                       | 0                        | 0                        |
| H <sub>2</sub>                  | 20.20 ± 0.27             | N.D.                                               | N.D.                    | N.D.                     | 19.69 ± 0.22             | 10.17 ± 0.36             | N.D.                                               | N.D.                    | N.D.                     | 17.76 ± 1.90             |
| Ex. protein <sup>e</sup>        | 4.19 ± 0.11              | 2.51 ± 0.19                                        | 3.39 ± 0.19             | 4.33 ± 0.14              | 3.61 ± 0.08              | 2.13 ± 0.08              | 1.59 ± 0.17                                        | 2.43 ± 0.15             | 1.99 ± 0.07              | 1.97 ± 0.27              |
| Alanine                         | 0.16 ± 0.01              | 0.17 ± 0.01                                        | 0.17 ± 0.01             | 0.17 ± 0.01              | 0.14 ± 0.00              | 0.24 ± 0.00              | 0.15 ± 0.01                                        | 0.22 ± 0.01             | 0.20 ± 0.01              | 0.13 ± 0.01              |
| Asparagine                      | <0.01                    | <0.01                                              | <0.01                   | <0.01                    | <0.01                    | <0.01                    | <0.01                                              | <0.01                   | <0.01                    | <0.01                    |
| Aspartate                       | <0.01                    | 0.06 ± 0.01                                        | 0.03 ± 0.00             | 0.02 ± 0.01              | 0.03 ± 0.02              | 0.01 ± 0.00              | 0.02 ± 0.00                                        | <0.01                   | 0.02 ± 0.00              | <0.01                    |
| Glycine                         | 0.03 ± 0.01              | 0.03 ± 0.00                                        | 0.03 ± 0.00             | 0.02 ± 0.00              | 0.02 ± 0.00              | 0.03 ± 0.00              | 0.02 ± 0.00                                        | 0.02 ± 0.00             | 0.02 ± 0.00              | <0.01                    |
| Glutamate                       | 0.10 ± 0.01              | 0.10 ± 0.02                                        | 0.08 ± 0.01             | 0.12 ± 0.01              | 0.10 ± 0.01              | 0.22 ± 0.01              | 0.16 ± 0.01                                        | 0.18 ± 0.01             | 0.31 ± 0.01              | 0.21 ± 0.02              |
| Glutamine/arginine <sup>e</sup> | 0.03 ± 0.01              | 0.08 ± 0.02                                        | 0.08 ± 0.03             | 0.06 ± 0.01              | 0.02 ± 0.00              | 0.02 ± 0.01              | 0.08 ± 0.01                                        | 0.10 ± 0.01             | 0.04 ± 0.00              | 0.01 ± 0.00              |
| Histidine                       | <0.01                    | <0.01                                              | <0.01                   | <0.01                    | <0.01                    | <0.01                    | <0.01                                              | 0.01 ± 0.00             | <0.01                    | <0.01                    |
| Isoleucine                      | 0.08 ± 0.00              | 0.04 ± 0.00                                        | 0.09 ± 0.00             | 0.10 ± 0.01              | 0.07 ± 0.00              | 0.63 ± 0.02              | 0.23 ± 0.03                                        | 0.70 ± 0.15             | 0.57 ± 0.05              | 0.15 ± 0.05              |
| Leucine                         | 0.05 ± 0.00              | 0.09 ± 0.01                                        | <0.01                   | 0.04 ± 0.04              | 0.05 ± 0.00              | 0.16 ± 0.01              | 0.14 ± 0.01                                        | 0.18 ± 0.00             | 0.18 ± 0.01              | 0.07 ± 0.01              |
| Methionine                      | <0.01                    | <0.01                                              | <0.01                   | <0.01                    | <0.01                    | 0.39 ± 0.03              | <0.01                                              | 0.03 ± 0.03             | 0.06 ± 0.02              | 0.01 ± 0.01              |
| Phenylalanine                   | 0.09 ± 0.01              | 0.35 ± 0.05                                        | 0.10 ± 0.02             | 0.08 ± 0.01              | 0.08 ± 0.00              | 0.35 ± 0.01              | 0.36 ± 0.11                                        | 0.35 ± 0.04             | 0.48 ± 0.02              | 0.39 ± 0.09              |
| Serine                          | 0.05 ± 0.01              | 0.04 ± 0.00                                        | 0.05 ± 0.00             | 0.05 ± 0.00              | 0.04 ± 0.00              | 0.04 ± 0.00              | 0.03 ± 0.00                                        | 0.04 ± 0.00             | 0.04 ± 0.00              | 0.02 ± 0.01              |
| Threonine                       | 0.11 ± 0.01              | 0.13 ± 0.01                                        | 0.12 ± 0.01             | 0.12 ± 0.01              | 0.10 ± 0.01              | 0.12 ± 0.00              | 0.12 ± 0.01                                        | 0.10 ± 0.01             | 0.17 ± 0.02              | 0.02 ± 0.01              |
| Tryptophan                      | <0.01                    | 0.03 ± 0.00                                        | <0.01                   | <0.01                    | <0.01                    | <0.01                    | <0.01                                              | <0.01                   | <0.01                    | <0.01                    |
| Tyrosine                        | 0.07 ± 0.00              | 0.06 ± 0.01                                        | 0.04 ± 0.00             | <0.01                    | <0.01                    | 0.15 ± 0.01              | 0.09 ± 0.01                                        | 0.11 ± 0.01             | 0.31 ± 0.08              | <0.01                    |
| Valine                          | 0.17 ± 0.01              | 0.06 ± 0.00                                        | 0.25 ± 0.02             | 0.29 ± 0.01              | 0.11 ± 0.00              | 3.37 ± 0.08              | 0.63 ± 0.14                                        | 3.11 ± 1.16             | 3.27 ± 0.42              | 0.80 ± 0.47              |
| <b>Sum of all products</b>      | <b>90 ± 1</b>            | <b>73 ± 0</b>                                      | <b>72 ± 2</b>           | <b>70 ± 1</b>            | <b>86 ± 2</b>            | <b>80 ± 1</b>            | <b>71 ± 1</b>                                      | <b>68 ± 2</b>           | <b>68 ± 1</b>            | <b>76 ± 1</b>            |
| <b>Sum of amino acids</b>       | <b>0.96 ± 0.04</b>       | <b>1.24 ± 0.05</b>                                 | <b>1.04 ± 0.07</b>      | <b>1.08 ± 0.07</b>       | <b>0.76 ± 0.03</b>       | <b>5.71 ± 0.09</b>       | <b>2.06 ± 0.33</b>                                 | <b>5.18 ± 1.33</b>      | <b>5.67 ± 0.42</b>       | <b>1.83 ± 0.51</b>       |

<sup>a</sup> Data are shown as average ± standard deviation for three biological replicates.

<sup>b</sup> The following elemental degree of reductions were used: C = 4, H = 1, O = -2, N = -3, S = 6.

<sup>c</sup> Based on a molecular weight of 24.66 g mol<sup>-1</sup> and a degree-of-reduction of 4.30 for the biomass composition CH<sub>1.71</sub>O<sub>0.43</sub>N<sub>0.20</sub>S<sub>0.01</sub> with 4.32 % ash content (60).

<sup>d</sup> Calculated from fermentation product yields and biomass yield (see Materials and Methods)

<sup>e</sup> Based on a molecular weight of a general protein (see Supplemental Table S2 and Materials and Methods).

<sup>f</sup> Estimated lower value based on a degree of reduction of 18.

N.D. not determined

**TABLE S5.** Nitrogen recovery on consumed ammonium in chemostats limited on either cellobiose or ammonium at a dilution rate of 0.10 h<sup>-1</sup>.<sup>a</sup>

| % (Nmol/Nmol)                   | Cellobiose-limitation    |                                                         |                          |                           |                           | Ammonium-limitation      |                                                         |                          |                           |                           |
|---------------------------------|--------------------------|---------------------------------------------------------|--------------------------|---------------------------|---------------------------|--------------------------|---------------------------------------------------------|--------------------------|---------------------------|---------------------------|
|                                 | Reference strain (LL345) | AVM064 ( $\Delta ppdk$ $\Delta malE::P_{eno^-}$ $pyk$ ) | AVM003 ( $\Delta ppdk$ ) | LL1084 ( $\Delta nfnAB$ ) | AG1715 ( $\Delta gogat$ ) | Reference strain (LL345) | AVM064 ( $\Delta ppdk$ $\Delta malE::P_{eno^-}$ $pyk$ ) | AVM003 ( $\Delta ppdk$ ) | LL1084 ( $\Delta nfnAB$ ) | AG1715 ( $\Delta gogat$ ) |
| <b>Biomass<sup>b</sup></b>      | 50.45 ± 1.13             | 49.96 ± 1.52                                            | 53.18 ± 1.83             | 37.10 ± 2.43              | 39.18 ± 1.10              | 56.01 ± 1.61             | 72.80 ± 3.19                                            | 62.93 ± 4.45             | 62.60 ± 1.72              | 57.36 ± 4.53              |
| Glucose                         | 0                        | 0                                                       | 0                        | 0                         | 0                         | 0                        | 0                                                       | 0                        | 0                         | 0                         |
| Ethanol                         | 0                        | 0                                                       | 0                        | 0                         | 0                         | 0                        | 0                                                       | 0                        | 0                         | 0                         |
| Acetate                         | 0                        | 0                                                       | 0                        | 0                         | 0                         | 0                        | 0                                                       | 0                        | 0                         | 0                         |
| Formate                         | 0                        | 0                                                       | 0                        | 0                         | 0                         | 0                        | 0                                                       | 0                        | 0                         | 0                         |
| Lactate                         | 0                        | 0                                                       | 0                        | 0                         | 0                         | 0                        | 0                                                       | 0                        | 0                         | 0                         |
| Pyruvate                        | 0                        | 0                                                       | 0                        | 0                         | 0                         | 0                        | 0                                                       | 0                        | 0                         | 0                         |
| Malate                          | 0                        | 0                                                       | 0                        | 0                         | 0                         | 0                        | 0                                                       | 0                        | 0                         | 0                         |
| CO <sub>2</sub> <sup>c</sup>    | 0                        | 0                                                       | 0                        | 0                         | 0                         | 0                        | 0                                                       | 0                        | 0                         | 0                         |
| H <sub>2</sub>                  | 0                        | 0                                                       | 0                        | 0                         | 0                         | 0                        | 0                                                       | 0                        | 0                         | 0                         |
| <b>Ex. protein<sup>d</sup></b>  | 16.95 ± 1.09             | 10.85 ± 0.48                                            | 13.03 ± 0.43             | 13.21 ± 0.59              | 11.14 ± 0.56              | 10.97 ± 0.44             | 10.89 ± 1.08                                            | 13.01 ± 1.02             | 11.47 ± 0.50              | 8.71 ± 0.56               |
| Alanine                         | 0.89 ± 0.05              | 0.98 ± 0.12                                             | 0.93 ± 0.03              | 0.70 ± 0.06               | 0.58 ± 0.03               | 1.66 ± 0.06              | 1.41 ± 0.10                                             | 1.62 ± 0.07              | 1.56 ± 0.04               | 0.80 ± 0.13               |
| Asparagine                      | 0.04 ± 0.00              | 0.07 ± 0.01                                             | 0.05 ± 0.00              | 0.01 ± 0.00               | 0.01 ± 0.00               | 0.02 ± 0.03              | 0.03 ± 0.00                                             | 0.02 ± 0.00              | 0.03 ± 0.00               | <0.01                     |
| Aspartate                       | 0.04 ± 0.06              | 0.32 ± 0.04                                             | 0.14 ± 0.01              | 0.09 ± 0.05               | 0.11 ± 0.07               | 0.06 ± 0.01              | 0.18 ± 0.04                                             | 0.05 ± 0.00              | 0.13 ± 0.02               | 0.02 ± 0.01               |
| Glycine                         | 0.28 ± 0.02              | 0.35 ± 0.04                                             | 0.28 ± 0.03              | 0.19 ± 0.02               | 0.16 ± 0.02               | 0.38 ± 0.01              | 0.38 ± 0.05                                             | 0.35 ± 0.02              | 0.38 ± 0.03               | 0.06 ± 0.02               |
| Glutamate                       | 0.38 ± 0.02              | 0.39 ± 0.05                                             | 0.29 ± 0.01              | 0.32 ± 0.04               | 0.29 ± 0.02               | 1.01 ± 0.05              | 0.96 ± 0.05                                             | 0.88 ± 0.04              | 1.62 ± 0.06               | 0.83 ± 0.12               |
| Glutamine/arginine <sup>e</sup> | 0.19 ± 0.01              | 0.60 ± 0.16                                             | 0.45 ± 0.03              | 0.35 ± 0.04               | 0.12 ± 0.02               | 0.16 ± 0.07              | 0.98 ± 0.10                                             | 1.00 ± 0.09              | 0.38 ± 0.04               | 0.11 ± 0.02               |
| Histidine                       | <0.01                    | <0.01                                                   | <0.01                    | <0.01                     | <0.01                     | 0.01 ± 0.00              | 0.12 ± 0.03                                             | 0.19 ± 0.05              | 0.08 ± 0.01               | 0.05 ± 0.05               |
| Isoleucine                      | 0.17 ± 0.01              | 0.10 ± 0.01                                             | 0.20 ± 0.01              | 0.17 ± 0.03               | 0.11 ± 0.00               | 1.74 ± 0.02              | 0.85 ± 0.11                                             | 2.02 ± 0.39              | 1.76 ± 0.14               | 0.38 ± 0.16               |
| Leucine                         | 0.11 ± 0.01              | 0.21 ± 0.03                                             | <0.01                    | 0.07 ± 0.06               | 0.08 ± 0.00               | 0.44 ± 0.01              | 0.53 ± 0.04                                             | 0.52 ± 0.01              | 0.55 ± 0.01               | 0.17 ± 0.04               |
| Methionine                      | <0.01                    | <0.01                                                   | <0.01                    | <0.01                     | 0.01 ± 0.02               | 1.09 ± 0.10              | 0.03 ± 0.01                                             | 0.07 ± 0.09              | 0.17 ± 0.05               | 0.04 ± 0.03               |
| Phenylalanine                   | 0.15 ± 0.01              | 0.61 ± 0.05                                             | 0.14 ± 0.01              | 0.09 ± 0.02               | 0.09 ± 0.01               | 0.72 ± 0.04              | 1.01 ± 0.33                                             | 0.75 ± 0.11              | 1.12 ± 0.06               | 0.69 ± 0.14               |
| Serine                          | 0.35 ± 0.04              | 0.30 ± 0.04                                             | 0.30 ± 0.00              | 0.26 ± 0.02               | 0.21 ± 0.01               | 0.33 ± 0.03              | 0.32 ± 0.01                                             | 0.35 ± 0.03              | 0.39 ± 0.04               | 0.17 ± 0.06               |
| Threonine                       | 0.46 ± 0.03              | 0.56 ± 0.07                                             | 0.45 ± 0.04              | 0.37 ± 0.04               | 0.30 ± 0.04               | 0.63 ± 0.01              | 0.83 ± 0.10                                             | 0.54 ± 0.05              | 1.01 ± 0.08               | 0.07 ± 0.06               |
| Tryptophan                      | 0.01 ± 0.01              | 0.09 ± 0.01                                             | 0.03 ± 0.00              | <0.01                     | <0.01                     | <0.01                    | 0.02 ± 0.00                                             | 0.02 ± 0.00              | <0.01                     | <0.01                     |
| Tyrosine                        | 0.13 ± 0.01              | 0.12 ± 0.01                                             | 0.07 ± 0.00              | <0.01                     | <0.01                     | 0.33 ± 0.02              | 0.26 ± 0.03                                             | 0.25 ± 0.02              | 0.77 ± 0.21               | <0.01                     |
| Valine                          | 0.45 ± 0.01              | 0.19 ± 0.02                                             | 0.66 ± 0.03              | 0.59 ± 0.04               | 0.24 ± 0.01               | 11.71 ± 0.11             | 2.92 ± 0.68                                             | 11.17 ± 3.86             | 12.69 ± 1.43              | 2.48 ± 1.68               |
| <b>Sum of all products</b>      | <b>71 ± 2</b>            | <b>66 ± 2</b>                                           | <b>47 ± 41</b>           | <b>54 ± 3</b>             | <b>53 ± 2</b>             | <b>87 ± 2</b>            | <b>95 ± 3</b>                                           | <b>96 ± 2</b>            | <b>97 ± 1</b>             | <b>72 ± 6</b>             |
| <b>Sum of amino acids</b>       | <b>3.66 ± 0.00</b>       | <b>4.88 ± 0.49</b>                                      | <b>2.66 ± 2.31</b>       | <b>3.23 ± 0.36</b>        | <b>2.31 ± 0.21</b>        | <b>20.28 ± 0.36</b>      | <b>10.83 ± 1.55</b>                                     | <b>19.79 ± 4.23</b>      | <b>22.65 ± 1.40</b>       | <b>5.87 ± 2.06</b>        |

<sup>a</sup> Data are shown as average ± standard deviation for three biological replicates.<sup>b</sup> Based on a molecular weight of 24.66 g mol<sup>-1</sup> for the biomass composition CH<sub>1.71</sub>O<sub>0.43</sub>N<sub>0.20</sub>S<sub>0.01</sub> with 4.32 % ash content (60).<sup>c</sup> Calculated from fermentation product yields and biomass yield (see Materials and Methods)<sup>d</sup> Based on a molecular weight of a general protein (see Supplemental Table S2 and Materials and Methods).<sup>e</sup> Estimated lower value based on 2 nitrogens per mole.

**TABLE S6.** Biomass-specific conversion rates in chemostats limited on either cellobiose or ammonium at a dilution rate of 0.10 h<sup>-1</sup>.<sup>a,b</sup>

|                                                                   | Cellobiose-limitation    |                                                         |                          |                           |                           | Ammonium-limitation      |                                                         |                          |                           |                           |
|-------------------------------------------------------------------|--------------------------|---------------------------------------------------------|--------------------------|---------------------------|---------------------------|--------------------------|---------------------------------------------------------|--------------------------|---------------------------|---------------------------|
|                                                                   | Reference strain (LL345) | AVM064 ( $\Delta ppdk$ $\Delta malE::P_{eno^-}$ $pyk$ ) | AVM003 ( $\Delta ppdk$ ) | LL1084 ( $\Delta nfnAB$ ) | AG1715 ( $\Delta gogat$ ) | Reference strain (LL345) | AVM064 ( $\Delta ppdk$ $\Delta malE::P_{eno^-}$ $pyk$ ) | AVM003 ( $\Delta ppdk$ ) | LL1084 ( $\Delta nfnAB$ ) | AG1715 ( $\Delta gogat$ ) |
| <b>Unit: mmol g<sub>biomass</sub><sup>-1</sup> h<sup>-1</sup></b> |                          |                                                         |                          |                           |                           |                          |                                                         |                          |                           |                           |
| Ethanol                                                           | 2.12 ± 0.15              | 3.66 ± 0.11                                             | 1.99 ± 0.11              | 2.12 ± 0.05               | 1.80 ± 0.14               | 2.65 ± 0.05              | 3.94 ± 0.20                                             | 2.02 ± 0.13              | 2.46 ± 0.17               | 1.63 ± 0.09               |
| Acetate                                                           | 3.03 ± 0.01              | 1.53 ± 0.08                                             | 3.02 ± 0.04              | 3.04 ± 0.03               | 2.96 ± 0.04               | 2.33 ± 0.01              | 1.54 ± 0.07                                             | 2.81 ± 0.18              | 2.48 ± 0.09               | 1.77 ± 0.15               |
| Formate                                                           | 0.25 ± 0.08              | 0.53 ± 0.04                                             | 0.20 ± 0.03              | 0.68 ± 0.02               | 0.16 ± 0.02               | 0.37 ± 0.03              | 0.80 ± 0.09                                             | 0.43 ± 0.11              | 0.31 ± 0.07               | 0.62 ± 0.24               |
| Lactate                                                           | 0.03 ± 0.00              | 0.05 ± 0.01                                             | 0.04 ± 0.00              | 0.03 ± 0.00               | 0.03 ± 0.00               | 0.17 ± 0.01              | 0.10 ± 0.04                                             | 0.15 ± 0.06              | 0.14 ± 0.02               | 0.08 ± 0.04               |
| Pyruvate                                                          | 0.01 ± 0.00              | 0.01 ± 0.00                                             | 0.03 ± 0.02              | 0.02 ± 0.00               | 0.02 ± 0.00               | 0.22 ± 0.01              | 0.03 ± 0.01                                             | 0.05 ± 0.01              | 0.08 ± 0.01               | 0.05 ± 0.03               |
| Malate                                                            | 0.01 ± 0.01              | 0.26 ± 0.05                                             | <0.01                    | <0.01                     | <0.01                     | <0.01                    | 0.09 ± 0.01                                             | <0.01                    | 0.01 ± 0.00               | <0.01                     |
| CO <sub>2</sub> <sup>c</sup>                                      | 5.21 ± 0.10              | 4.73 ± 0.19                                             | 5.14 ± 0.10              | 4.81 ± 0.08               | 4.93 ± 0.09               | 5.15 ± 0.04              | 4.97 ± 0.17                                             | 4.94 ± 0.18              | 5.16 ± 0.23               | 3.13 ± 0.33               |
| H <sub>2</sub>                                                    | 10.6 ± 0.3               | N.D.                                                    | N.D.                     | N.D.                      | 10.2 ± 0.2                | 6.1 ± 0.3                | N.D.                                                    | N.D.                     | N.D.                      | 9.0 ± 1.1                 |
| Ex. protein <sup>d</sup>                                          | 0.20 ± 0.01              | 0.13 ± 0.01                                             | 0.16 ± 0.01              | 0.21 ± 0.01               | 0.17 ± 0.00               | 0.12 ± 0.00              | 0.09 ± 0.01                                             | 0.13 ± 0.00              | 0.11 ± 0.01               | 0.09 ± 0.01               |
| Total amino acids <sup>e</sup>                                    | 0.06 ± 0.00              | 0.07 ± 0.01                                             | 0.06 ± 0.00              | 0.07 ± 0.00               | 0.05 ± 0.00               | 0.29 ± 0.01              | 0.11 ± 0.02                                             | 0.26 ± 0.08              | 0.28 ± 0.02               | 0.08 ± 0.02               |
| <b>Unit: μmol g<sub>biomass</sub><sup>-1</sup> h<sup>-1</sup></b> |                          |                                                         |                          |                           |                           |                          |                                                         |                          |                           |                           |
| Alanine                                                           | 14.2 ± 0.5               | 15.8 ± 1.4                                              | 13.9 ± 1.1               | 15.0 ± 0.5                | 12.0 ± 0.2                | 23.7 ± 0.3               | 15.6 ± 1.3                                              | 21.6 ± 1.9               | 19.6 ± 0.9                | 11.3 ± 1.1                |
| Asparagine                                                        | 0.3 ± 0.0                | 0.6 ± 0.1                                               | 0.3 ± 0.1                | <0.2                      | <0.2                      | <0.2                     | <0.2                                                    | <0.2                     | <0.2                      | <0.2                      |
| Aspartate                                                         | 0.6 ± 1.1                | 5.2 ± 0.7                                               | 2.1 ± 0.2                | 2.0 ± 1.0                 | 2.3 ± 1.5                 | 0.8 ± 0.1                | 2.0 ± 0.5                                               | 0.6 ± 0.0                | 1.7 ± 0.2                 | 0.3 ± 0.2                 |
| Cysteine                                                          | -80 ± 1                  | -304 ± 11                                               | -324 ± 5                 | -335 ± 11                 | -73 ± 54                  | -262 ± 117               | -409 ± 20                                               | -404 ± 128               | -473 ± 21                 | -66 ± 29                  |
| Glycine                                                           | 4.5 ± 0.5                | 5.7 ± 0.7                                               | 4.4 ± 0.3                | 4.1 ± 0.1                 | 3.2 ± 0.4                 | 5.4 ± 0.1                | 4.1 ± 0.5                                               | 4.7 ± 0.6                | 4.8 ± 0.4                 | 0.8 ± 0.4                 |
| Glutamate                                                         | 6.1 ± 0.2                | 6.3 ± 1.0                                               | 4.6 ± 0.1                | 6.9 ± 0.5                 | 5.9 ± 0.3                 | 14.4 ± 0.3               | 10.5 ± 0.4                                              | 11.8 ± 0.9               | 20.4 ± 0.7                | 11.6 ± 1.4                |
| Glutamine/arginine <sup>f</sup>                                   | 1.5 ± 0.1                | 4.8 ± 1.1                                               | 4.3 ± 1.3                | 3.7 ± 0.4                 | 1.3 ± 0.1                 | 1.2 ± 0.5                | 5.4 ± 0.6                                               | 6.6 ± 0.8                | 2.4 ± 0.3                 | 0.8 ± 0.1                 |
| Histidine                                                         | <0.2                     | <0.2                                                    | <0.2                     | <0.2                      | <0.2                      | <0.2                     | 0.5 ± 0.1                                               | 0.8 ± 0.2                | 0.3 ± 0.0                 | <0.2                      |
| Isoleucine                                                        | 2.8 ± 0.1                | 1.5 ± 0.1                                               | 3.1 ± 0.1                | 3.6 ± 0.5                 | 2.3 ± 0.0                 | 24.9 ± 0.7               | 9.3 ± 1.2                                               | 27.1 ± 7.1               | 22.2 ± 2.0                | 5.2 ± 1.8                 |
| Leucine                                                           | 1.8 ± 0.0                | 3.4 ± 0.3                                               | <0.2                     | 1.5 ± 1.3                 | 1.6 ± 0.0                 | 6.2 ± 0.2                | 5.8 ± 0.5                                               | 7.0 ± 0.4                | 6.9 ± 0.2                 | 2.3 ± 0.4                 |
| Methionine                                                        | <0.2                     | <0.2                                                    | <0.2                     | <0.2                      | <0.2                      | 15.6 ± 1.3               | 0.3 ± 0.1                                               | 1.0 ± 1.2                | 2.2 ± 0.6                 | 0.5 ± 0.3                 |
| Phenylalanine                                                     | 2.4 ± 0.2                | 9.9 ± 1.2                                               | 2.4 ± 0.5                | 2.0 ± 0.4                 | 2.0 ± 0.1                 | 10.3 ± 0.2               | 11.1 ± 3.4                                              | 10.0 ± 1.5               | 14.2 ± 1.1                | 9.8 ± 1.8                 |
| Serine                                                            | 5.7 ± 0.5                | 4.9 ± 0.5                                               | 4.7 ± 0.2                | 5.5 ± 0.2                 | 4.3 ± 0.2                 | 4.8 ± 0.4                | 3.5 ± 0.3                                               | 4.7 ± 0.1                | 5.0 ± 0.4                 | 2.4 ± 0.9                 |
| Threonine                                                         | 7.3 ± 0.5                | 9.0 ± 1.1                                               | 7.3 ± 0.7                | 7.8 ± 0.5                 | 6.2 ± 0.7                 | 9.1 ± 0.3                | 9.2 ± 1.1                                               | 7.2 ± 1.2                | 12.7 ± 1.0                | 1.0 ± 0.7                 |
| Tryptophan                                                        | <0.2                     | 0.8 ± 0.1                                               | <0.2                     | <0.2                      | <0.2                      | <0.2                     | <0.2                                                    | <0.2                     | <0.2                      | <0.2                      |
| Tyrosine                                                          | 2.0 ± 0.1                | 1.9 ± 0.2                                               | 1.1 ± 0.1                | <0.2                      | <0.2                      | 4.7 ± 0.2                | 2.9 ± 0.3                                               | 3.3 ± 0.1                | 9.8 ± 2.7                 | <0.2                      |
| Valine                                                            | 7.2 ± 0.3                | 3.0 ± 0.2                                               | 10.5 ± 0.2               | 12.7 ± 0.5                | 4.9 ± 0.2                 | 167.4 ± 5.1              | 32.1 ± 7.1                                              | 150.8 ± 63.0             | 159.8 ± 19.1              | 33.9 ± 20.5               |

<sup>a</sup> Data are shown as average ± standard deviation for three biological replicates.

<sup>b</sup> Negative values represent consumption and positive values represent production

<sup>c</sup> Calculated from fermentation product yields and biomass yield (see Materials and Methods)

<sup>d</sup> Based on a molecular weight of a general protein (see Supplemental Table S2 and Materials and Methods).

<sup>e</sup> Excluding cysteine.

<sup>f</sup> Sum of the two amino acids.

N.D. not determined.

**TABLE S7.** Concentrations of substrates and products in chemostats limited on either cellobiose or ammonium at a dilution rate of 0.10 h<sup>-1</sup>.<sup>a,b</sup>

|                                                               | Cellobiose-limitation    |                                                                   |                         |                          |                          | Ammonium-limitation      |                                                                   |                         |                          |                          |
|---------------------------------------------------------------|--------------------------|-------------------------------------------------------------------|-------------------------|--------------------------|--------------------------|--------------------------|-------------------------------------------------------------------|-------------------------|--------------------------|--------------------------|
|                                                               | Reference strain (LL345) | AVM064 ( <i>Appdk</i> $\Delta$ <i>malE::P<sub>eno</sub>-pyk</i> ) | AVM003 ( <i>Appdk</i> ) | LL1084 ( <i>AnfnAB</i> ) | AG1715 ( <i>Agogat</i> ) | Reference strain (LL345) | AVM064 ( <i>Appdk</i> $\Delta$ <i>malE::P<sub>eno</sub>-pyk</i> ) | AVM003 ( <i>Appdk</i> ) | LL1084 ( <i>AnfnAB</i> ) | AG1715 ( <i>Agogat</i> ) |
| OD (at 600 nm)                                                | 1.38 ± 0.03              | 1.28 ± 0.01                                                       | 1.39 ± 0.02             | 1.41 ± 0.01              | 1.42 ± 0.03              | 0.83 ± 0.01              | 0.90 ± 0.01                                                       | 1.22 ± 0.11             | 1.02 ± 0.04              | 0.87 ± 0.08              |
| Cell dry weight (g L <sup>-1</sup> )                          | 0.63 ± 0.01              | 0.62 ± 0.03                                                       | 0.69 ± 0.02             | 0.63 ± 0.00              | 0.66 ± 0.01 <sup>e</sup> | 0.33 ± 0.01              | 0.44 ± 0.02                                                       | 0.38 ± 0.03             | 0.38 ± 0.01              | 0.35 ± 0.03 <sup>e</sup> |
| Cb in feed (mmol L <sup>-1</sup> )                            | 13.72 ± 0.09             | 14.55 ± 0.08                                                      | 13.90 ± 0.23            | 14.22 ± 0.06             | 14.02 ± 0.12             | 13.71 ± 0.10             | 14.57 ± 0.01                                                      | 13.54 ± 0.11            | 14.18 ± 0.06             | 13.93 ± 0.16             |
| Residual cb (mmol L <sup>-1</sup> )                           | <0.01                    | <0.01                                                             | <0.01                   | <0.01                    | <0.01                    | 5.34 ± 0.08              | 3.21 ± 0.11                                                       | 4.85 ± 0.31             | 4.60 ± 0.30              | 6.53 ± 0.88              |
| Glu in feed (mmol L <sup>-1</sup> )                           | 38.16 ± 0.05             | 39.41 ± 0.94                                                      | 37.36 ± 1.08            | 38.79 ± 0.69             | 39.03 ± 0.58             | 4.81 ± 0.14              | 4.92 ± 0.05                                                       | 4.85 ± 0.03             | 4.93 ± 0.04              | 4.93 ± 0.05              |
| Residual glu (mmol L <sup>-1</sup> )                          | 28.04 ± 0.47             | 29.44 ± 0.42                                                      | 27.51 ± 0.64            | 25.07 ± 0.79             | 24.84 ± 0.51             | <0.01                    | <0.01                                                             | 0.03 ± 0.00             | <0.01                    | <0.01                    |
| NH <sub>4</sub> <sup>+</sup> in feed (mmol L <sup>-1</sup> )  | 0.07 ± 0.01              | <0.01                                                             | 0.04 ± 0.01             | <0.01                    | <0.01                    | 0.08 ± 0.00              | <0.01                                                             | 0.04 ± 0.00             | <0.01                    | <0.01                    |
| Residual NH <sub>4</sub> <sup>+</sup> (mmol L <sup>-1</sup> ) | 0.03 ± 0.01              | 0.02 ± 0.00                                                       | 0.02 ± 0.02             | <0.01                    | 0.02 ± 0.01              | 0.18 ± 0.01              | 0.23 ± 0.04                                                       | 0.31 ± 0.05             | 0.27 ± 0.03              | 0.23 ± 0.04              |
| Ethanol (mmol L <sup>-1</sup> )                               | 11.28 ± 0.71             | 19.08 ± 0.19                                                      | 11.35 ± 0.43            | 11.56 ± 0.14             | 9.98 ± 0.84              | 7.55 ± 0.29              | 14.91 ± 0.42                                                      | 6.23 ± 0.25             | 8.12 ± 0.41              | 4.87 ± 0.68              |
| Acetate (mmol L <sup>-1</sup> )                               | 18.97 ± 0.25             | 9.44 ± 0.22                                                       | 20.24 ± 0.30            | 19.63 ± 0.26             | 19.35 ± 0.06             | 7.84 ± 0.15              | 6.88 ± 0.16                                                       | 10.21 ± 1.23            | 9.69 ± 0.16              | 6.19 ± 0.11              |
| Formate (mmol L <sup>-1</sup> )                               | 1.58 ± 0.52              | 3.27 ± 0.30                                                       | 1.37 ± 0.17             | 4.37 ± 0.11              | 1.04 ± 0.12              | 1.24 ± 0.10              | 3.59 ± 0.34                                                       | 1.59 ± 0.46             | 1.20 ± 0.28              | 2.20 ± 0.87              |
| Lactate (mmol L <sup>-1</sup> )                               | 0.19 ± 0.02              | 0.30 ± 0.04                                                       | 0.24 ± 0.02             | 0.17 ± 0.03              | 0.23 ± 0.03              | 0.56 ± 0.05              | 0.46 ± 0.19                                                       | 0.53 ± 0.17             | 0.54 ± 0.05              | 0.28 ± 0.17              |
| Pyruvate (mmol L <sup>-1</sup> )                              | 0.05 ± 0.00              | 0.04 ± 0.01                                                       | 0.18 ± 0.11             | 0.12 ± 0.02              | 0.15 ± 0.01              | 0.75 ± 0.03              | 0.13 ± 0.02                                                       | 0.20 ± 0.04             | 0.29 ± 0.04              | 0.18 ± 0.11              |
| Malate (mmol L <sup>-1</sup> )                                | 0.06 ± 0.06              | 1.59 ± 0.28                                                       | <0.01                   | <0.01                    | <0.01                    | <0.01                    | 0.38 ± 0.03                                                       | <0.01                   | 0.02 ± 0.01              | <0.01                    |
| H <sub>2</sub> (mol%)                                         | 1.00 ± 0.03              | <0.01                                                             | <0.01                   | <0.01                    | 1.03 ± 0.02              | 0.31 ± 0.01              | <0.01                                                             | <0.01                   | <0.01                    | 0.49 ± 0.05              |
| Ex. protein (mg mL <sup>-1</sup> )                            | 0.144 ± 0.004            | 0.092 ± 0.007                                                     | 0.118 ± 0.006           | 0.155 ± 0.005            | 0.127 ± 0.003            | 0.045 ± 0.002            | 0.045 ± 0.004                                                     | 0.053 ± 0.004           | 0.048 ± 0.002            | 0.036 ± 0.002            |
| Ex. protein (mmol L <sup>-1</sup> ) <sup>d</sup>              | 1.28 ± 0.04              | 0.81 ± 0.06                                                       | 1.05 ± 0.05             | 1.37 ± 0.04              | 1.13 ± 0.03              | 0.40 ± 0.02              | 0.40 ± 0.04                                                       | 0.47 ± 0.04             | 0.43 ± 0.02              | 0.32 ± 0.02              |
| Alanine (μmol L <sup>-1</sup> )                               | 89.3 ± 3.0               | 97.0 ± 6.1                                                        | 92.9 ± 6.8              | 97.0 ± 3.6               | 77.5 ± 0.3               | 79.8 ± 0.6               | 69.5 ± 4.2                                                        | 77.9 ± 3.7              | 76.7 ± 1.7               | 38.9 ± 6.8               |
| Asparagine (μmol L <sup>-1</sup> )                            | 1.9 ± 0.1                | 3.5 ± 0.5                                                         | 2.3 ± 0.4               | 0.9 ± 0.1                | 0.7 ± 0.1                | 0.5 ± 0.7                | 0.8 ± 0.1                                                         | 0.4 ± 0.1               | 0.7 ± 0.1                | 0.3 ± 0.3                |
| Aspartate (μmol L <sup>-1</sup> )                             | 3.9 ± 6.8                | 32.2 ± 3.7                                                        | 14.3 ± 1.6              | 12.9 ± 6.5               | 14.1 ± 8.5               | 2.8 ± 0.4                | 8.8 ± 1.9                                                         | 2.2 ± 0.1               | 6.6 ± 1.1                | 0.5 ± 0.3                |
| Cys in feed (μmol L <sup>-1</sup> )                           | 775 ± 18                 | 2455 ± 70                                                         | 2760 ± 49               | 2744 ± 39                | 859 ± 351                | 1188 ± 424               | 2262 ± 77                                                         | 2221 ± 392              | 2487 ± 15                | 760 ± 54                 |
| Residual cys (μmol L <sup>-1</sup> )                          | 270 ± 12                 | 583 ± 67                                                          | 587 ± 31                | 582 ± 17                 | 432 ± 38                 | 303 ± 16                 | 433 ± 39                                                          | 775 ± 83                | 638 ± 18                 | 685 ± 33                 |
| Glycine (μmol L <sup>-1</sup> )                               | 28.0 ± 3.0               | 35.2 ± 3.3                                                        | 29.8 ± 2.7              | 26.5 ± 0.7               | 20.5 ± 2.0               | 18.1 ± 0.6               | 18.4 ± 2.2                                                        | 16.8 ± 1.2              | 18.7 ± 1.3               | 2.7 ± 0.7                |
| Glutamate (μmol L <sup>-1</sup> )                             | 38.1 ± 1.0               | 38.7 ± 5.6                                                        | 30.7 ± 1.4              | 44.4 ± 3.1               | 33.6 ± 2.6               | 48.5 ± 1.8               | 47.1 ± 2.3                                                        | 42.6 ± 2.0              | 79.9 ± 3.7               | 32.2 ± 5.6               |
| Gln/arginine (μmol L <sup>-1</sup> ) <sup>e</sup>             | 9.6 ± 0.5                | 29.5 ± 6.3                                                        | 28.6 ± 9.4              | 23.8 ± 2.4               | 9.1 ± 1.6                | 3.9 ± 1.8                | 24.2 ± 2.3                                                        | 24.0 ± 2.1              | 9.5 ± 1.1                | 5.5 ± 3.9                |
| Histidine (μmol L <sup>-1</sup> )                             | <0.1                     | <0.1                                                              | <0.1                    | <0.1                     | <0.1                     | 0.2 ± 0.1                | 2.0 ± 0.4                                                         | 3.0 ± 0.7               | 1.2 ± 0.1                | 0.7 ± 0.6                |
| Isoleucine (μmol L <sup>-1</sup> )                            | 17.5 ± 0.5               | 9.5 ± 0.6                                                         | 20.5 ± 0.9              | 23.0 ± 2.8               | 14.8 ± 0.2               | 83.6 ± 1.5               | 41.8 ± 5.3                                                        | 97.1 ± 19.0             | 86.7 ± 6.2               | 18.4 ± 7.7               |
| Leucine (μmol L <sup>-1</sup> )                               | 11.2 ± 0.2               | 21.0 ± 1.6                                                        | <0.1                    | 9.8 ± 8.5                | 10.5 ± 0.3               | 20.9 ± 0.7               | 25.9 ± 1.9                                                        | 25.2 ± 0.5              | 26.9 ± 0.6               | 8.1 ± 1.9                |
| Methionine (μmol L <sup>-1</sup> )                            | 0.6 ± 1.0                | 0.3 ± 0.5                                                         | <0.1                    | <0.1                     | 1.4 ± 2.5                | 52.5 ± 3.6               | 1.5 ± 0.3                                                         | 3.5 ± 4.4               | 8.6 ± 2.6                | 6.1 ± 1.7                |
| Phenylalanine (μmol L <sup>-1</sup> )                         | 14.8 ± 1.2               | 60.8 ± 8.3                                                        | 16.2 ± 3.6              | 12.8 ± 2.3               | 12.7 ± 0.6               | 34.8 ± 1.2               | 49.7 ± 15.7                                                       | 36.1 ± 5.5              | 55.3 ± 2.5               | 32.8 ± 6.1               |
| Serine (μmol L <sup>-1</sup> )                                | 35.6 ± 3.2               | 30.2 ± 2.1                                                        | 31.7 ± 0.3              | 35.5 ± 1.4               | 27.7 ± 0.6               | 16.0 ± 1.7               | 15.7 ± 0.6                                                        | 17.1 ± 1.3              | 19.4 ± 1.9               | 7.4 ± 2.3                |
| Threonine (μmol L <sup>-1</sup> )                             | 46.1 ± 3.3               | 55.5 ± 5.2                                                        | 48.9 ± 5.4              | 50.6 ± 3.2               | 39.5 ± 3.4               | 30.5 ± 0.6               | 41.0 ± 4.9                                                        | 25.9 ± 2.6              | 49.8 ± 3.6               | 3.7 ± 2.3                |
| Tryptophan (μmol L <sup>-1</sup> )                            | 0.7 ± 0.1                | 4.7 ± 0.6                                                         | 1.2 ± 0.7               | 0.5 ± 0.1                | <0.1                     | <0.1                     | 0.4 ± 0.1                                                         | 0.4 ± 0.1               | <0.1                     | <0.1                     |
| Tyrosine (μmol L <sup>-1</sup> )                              | 12.5 ± 0.2               | 11.5 ± 1.1                                                        | 7.2 ± 0.3               | <0.1                     | <0.1                     | 15.7 ± 0.4               | 12.8 ± 1.3                                                        | 11.8 ± 1.1              | 38.2 ± 10.4              | <0.1                     |
| Valine (μmol L <sup>-1</sup> )                                | 45.4 ± 1.7               | 18.4 ± 1.1                                                        | 70.3 ± 3.2              | 82.1 ± 4.2               | 32.0 ± 1.5               | 563 ± 12                 | 144 ± 32                                                          | 538 ± 188               | 625 ± 67                 | 123 ± 83                 |

<sup>a</sup> Data are shown as average ± standard deviation for three biological replicates.<sup>b</sup> Abbreviations: cb, cellobiose; glu, glucose; cys, cysteine; gln, glutamine.<sup>c</sup> Based on OD with an average CDW-to-OD conversion factor of 2.16 (OD/CDW) in cellobiose limitation and 2.48 in nitrogen limitation.<sup>d</sup> Based on a molecular weight of a general protein (see Supplemental Table S2 and Materials and Methods).<sup>e</sup> Sum of the two amino acids.



**TABLE S8.** Lactate dehydrogenase activities for different strains in this study at different conditions, expressed in  $\mu\text{mol mg}_{\text{protein}}^{-1} \text{min}^{-1}$ .<sup>a</sup>

| Strain                                                                 | Exponential phase in batch | Cellobiose-limitation | Ammonium-limitation |
|------------------------------------------------------------------------|----------------------------|-----------------------|---------------------|
| <b>WT</b>                                                              | 0.51 ± 0.03                | N.D.                  | N.D.                |
| <b>AVM003 (<math>\Delta ppdk</math>)</b>                               | 0.30 ± 0.06                | N.D.                  | N.D.                |
| <b>AVM064 (<math>\Delta ppdk \Delta me::P_{\text{eno}}-pyk</math>)</b> | 0.33 ± 0.03                | N.D.                  | N.D.                |
| <b>LL345 (<math>\Delta hpt</math>)</b>                                 | N.D.                       | 0.69 ± 0.02           | 2.65 ± 0.26         |
| <b>AG1715 (<math>\Delta hpt \Delta gogat</math>)</b>                   | N.D.                       | 0.40 ± 0.02           | 0.9 ± 0.03          |

<sup>a</sup> Data are shown as average ± standard deviation for four technical replicates of biological duplicates.

N.D. not determined
